# Supplementary material for: Portable and laboratory analytical instruments for the study of materials, techniques and environmental impacts in mediaeval mural paintings
Source: Royal Society of Chemistry journal article supplement (doi:10.1039/c8ay00871j), 2018-01-01
Supplement: c8ay00871j1.pdf [file c8ay00871j1.pdf]

**Table S1:** Articles mentioned and techniques employed for the study of medieval wall paintings

[illegible]

[illegible]

[illegible]

[illegible]

|                                   |                                                                                                                                                                                                                                      |   |   |   |   |   |   |   |  |  |   |   |  |   |   |  |  |                                            |
|-----------------------------------|--------------------------------------------------------------------------------------------------------------------------------------------------------------------------------------------------------------------------------------|---|---|---|---|---|---|---|--|--|---|---|--|---|---|--|--|--------------------------------------------|
| <i>al.</i> 2009                   | Slovakia, (11 <sup>th</sup> c.)                                                                                                                                                                                                      |   |   |   |   |   |   |   |  |  |   |   |  |   |   |  |  | mortar, decay products                     |
| 99 Edwards <i>et al.</i> 2008     | Winchester Cathedral, UK; (12 <sup>th</sup> c.), Southwell Minster, Nottingham, UK; Norman monastery, (12 <sup>th</sup> -14 <sup>th</sup> c.) Stibbard Church, Stibbard, Cambridgeshire, UK, (14 <sup>th</sup> –15 <sup>th</sup> c.) | ✓ |   | ✓ |   |   |   |   |  |  |   |   |  |   |   |  |  | Plaster and mortars                        |
| 100 Amato <i>et al.</i> 2017      | Church of Santa Maria Antiqua al Foro Romano, Rome, Italy, (6 <sup>th</sup> c.)                                                                                                                                                      | ✓ | ✓ | ✓ |   |   | ✓ |   |  |  |   |   |  |   |   |  |  | Pigments, mortar, decay products           |
| 101 Robador <i>et al.</i> 2016    | Seville Alcazar, Spain, (10 <sup>th</sup> -12 <sup>th</sup> c.)                                                                                                                                                                      | ✓ | ✓ | ✓ | ✓ | ✓ |   | ✓ |  |  |   |   |  |   |   |  |  | Pigments, mortar, decay products           |
| 102 Daniilia <i>et al.</i> 2008   | St Stephen’s monastery, at the Meteora, Greece (17th century)                                                                                                                                                                        | ✓ |   | ✓ | ✓ | ✓ | ✓ |   |  |  |   |   |  | ✓ |   |  |  | Mortars, pigments, binders, decay products |
| 103 Perardi <i>et al.</i> 2003    | Chapel of St. Orso Priory palace, Aosta, Italy, (15 <sup>th</sup> c.)                                                                                                                                                                |   | ✓ | ✓ |   |   |   |   |  |  | ✓ |   |  |   |   |  |  | Pigments, decay products                   |
| 104 Hein <i>et al.</i> 2009       | Churches from Mani Peninsula, Greece, (15 <sup>th</sup> c.)                                                                                                                                                                          | ✓ |   |   |   | ✓ | ✓ | ✓ |  |  |   |   |  |   |   |  |  | Pigments, mortars, decay products          |
| 105 Veneranda <i>et al.</i> 2014  | Assumption’s church of Alaiza, Basque Country, Spain, (14 <sup>th</sup> c.)                                                                                                                                                          | ✓ | ✓ | ✓ | ✓ |   |   |   |  |  |   |   |  |   | ✓ |  |  | Pigments, mortars, decay products          |
| 106 Fico <i>et al.</i> 2016       | Santi Stefani crypt, Vaste, Italy,(10 <sup>th</sup> -14 <sup>th</sup> c.)                                                                                                                                                            | ✓ |   | ✓ |   |   | ✓ |   |  |  |   |   |  |   | ✓ |  |  | Pigments, binders, decay products          |
| 107 Andreotti et al. 2006         | Monumental Cemetery of Pisa, Italy, (14 <sup>th</sup> c.)                                                                                                                                                                            | ✓ |   |   |   | ✓ | ✓ |   |  |  |   | ✓ |  | ✓ |   |  |  | Pigments, mortars, decay products          |
| 108 Iordanidis <i>et al.</i> 2011 | Church of Agios Georgios Vounou, Nikolaos Kyritzi and Nikolaos Magaliou (14 <sup>th</sup> –17 <sup>th</sup> c.), Kastoria, Gr.                                                                                                       | ✓ |   | ✓ |   | ✓ |   |   |  |  |   |   |  |   |   |  |  | Pigments, decay products                   |
| 109 Sfarra <i>et al.</i> 2016     | Madonna con Bambino in the Piazza del Popolo in Fontecchio, Italy, (13 <sup>th</sup> -15 <sup>th</sup> c.)                                                                                                                           | ✓ | ✓ | ✓ |   | ✓ | ✓ |   |  |  | ✓ |   |  |   |   |  |  | Decay products                             |

[illegible]

|                                        |                                                                                                                   |   |   |   |   |   |   |   |  |  |  |  |  |  |   |  |  |  |                                        |
|----------------------------------------|-------------------------------------------------------------------------------------------------------------------|---|---|---|---|---|---|---|--|--|--|--|--|--|---|--|--|--|----------------------------------------|
| 2016                                   | in Ocre, L'Aquila, Italy,<br>(13 <sup>th</sup> -14 <sup>th</sup> c.)                                              |   |   |   |   |   |   |   |  |  |  |  |  |  |   |  |  |  | mortars, decay<br>product              |
| 123 Dei <i>et al.</i> 1998             | Church of San Pietro at<br>Quaracchi, Italy, (14 <sup>th</sup> -15 <sup>th</sup><br>c.)                           | ✓ |   |   |   |   | ✓ | ✓ |  |  |  |  |  |  |   |  |  |  | Pigments, decay<br>products,           |
| 124 Costantini <i>et al.</i> 2018      | Saint Stephen Church<br>Ribera de Valderejo,<br>Álava, Basque<br>Country,.(15 <sup>th</sup> -16 <sup>th</sup> c.) | ✓ | ✓ | ✓ | ✓ | ✓ |   |   |  |  |  |  |  |  |   |  |  |  | Pigments,<br>mortar, decay<br>products |
| 125 Pérez-Alonso<br><i>et al.</i> 2004 | Church of Santa Maria of<br>Hermo, Asturias, Spain,<br>(15 <sup>th</sup> c.)                                      | ✓ |   | ✓ |   |   | ✓ |   |  |  |  |  |  |  | ✓ |  |  |  | Pigments,<br>mortar, decay<br>products |
